# Supplementary material for: Preparation of CaMgAl-LDHs and mesoporous silica sorbents derived from blast furnace slag for CO2 capture
Source: PubMed Central journal article supplement — RSC Adv. 2019 Feb 19;9(11):6054–63. doi: 10.1039/c8ra08458k (PMC9060887; doi:10.1039/c8ra08458k), 2019-02-19
Supplement: RA-009-C8RA08458K-s002.pdf [file RA-009-C8RA08458K-s002.pdf]

## Supporting Information

### **Preparation of CaMgAl-LDHs and mesoporous silica sorbents derived from blast furnace slag for CO<sub>2</sub> capture**

Haojie Jiang,<sup>a</sup> Hongwei Guo,<sup>\*a</sup> Peng Li,<sup>\*a</sup> Yang Li<sup>b</sup> and Bingji Yan<sup>a</sup>

<sup>a</sup>*Shagang School of Iron and Steel, Soochow University, Suzhou 215021, PR. China*

<sup>b</sup>*The State Key Laboratory of Refractories and Metallurgy, School of Materials and Metallurgy, Wuhan University of Science and Technology, Wuhan 430081, China.*

\*E-mail: guohongwei@suda.edu.cn; lipeng@suda.edu.cn;

## Figures:

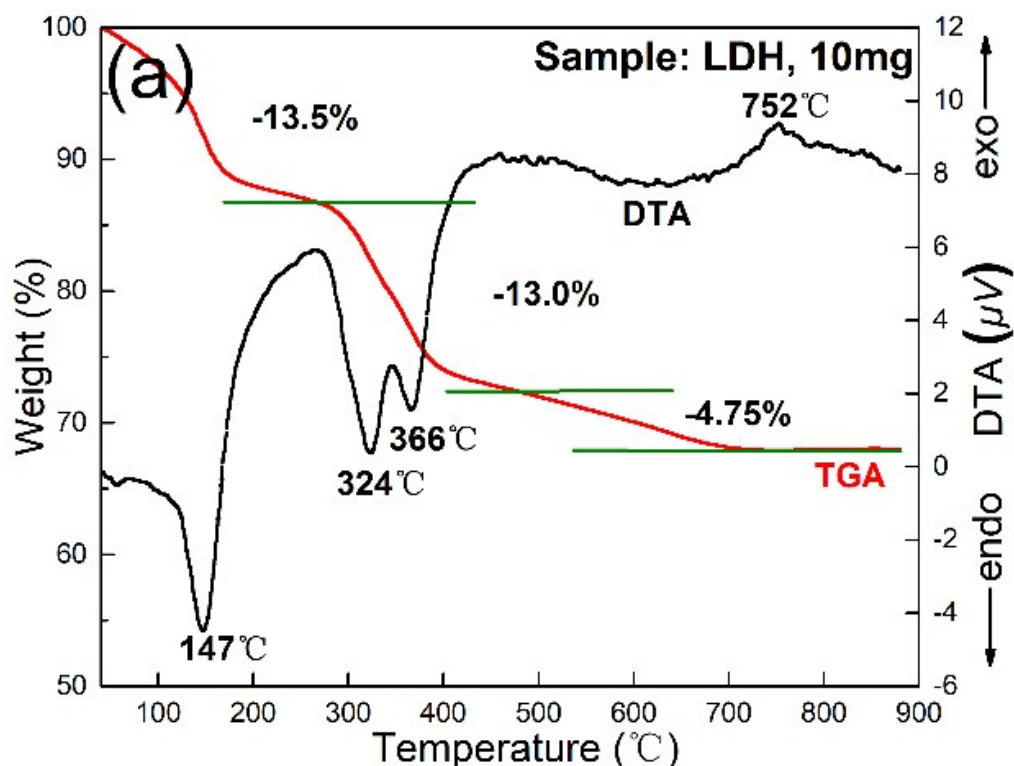

Fig.S1 TGA and DTA profiles of LDHs

Analysis: The thermal degradation events of as-prepared LDHs material from BF slag were further studied by TGA in  $\text{N}_2$  atmosphere as shown in Figure S1. For the thermal decomposition of the Ca-Mg-Al LDHs, three distinct weight loss steps are observed. The first step from room temperature to approximately  $250^{\circ}\text{C}$  corresponds to the removal of the surface-adsorbed water and the interlayer water molecules, with 13.5% weight loss. The second weight loss step in the temperature range from 250 to  $480^{\circ}\text{C}$  is due to the dehydroxylation of the brucite-like layers. In this transition region, the appearance of two endothermic reflections at  $324^{\circ}\text{C}$ ,  $366^{\circ}\text{C}$  are likely assignable to the dehydroxylation of Ca-Al LDH and that of Mg-Al LDH, respectively. The third weight loss step in the temperature range from 480 to  $700^{\circ}\text{C}$  is due to the decomposition of intercalated anions, most likely are  $\text{Cl}^-$  and a small amount of  $\text{CO}_3^{2-}$  considering the experimental condition. An additional exothermic reflection around  $750^{\circ}\text{C}$  is observed, this can be ascribed to the transition from Ca(Al)-O mixed oxide into CaO and mayenite ( $\text{Ca}_{12}\text{Al}_{14}\text{O}_{33}$ ).

## Tables

**Table S1** Chemical composition analysis of CaMgAl-LDHs and CaMgAl-LDHs-400 derived from BFS

| Sample          | Content of elements(wt%) |                 |                 |                 |
|-----------------|--------------------------|-----------------|-----------------|-----------------|
|                 | Ca <sup>A</sup>          | Mg <sup>A</sup> | Al <sup>A</sup> | Cl <sup>B</sup> |
| CaMgAl-LDHs     | 22.14                    | 6.28            | 7.90            | 8.69            |
| CaMgAl-LDHs-400 | 38.25                    | 11.75           | 13.56           | 2.11            |

<sup>A</sup> Determined by ICP-OES analysis.

<sup>B</sup> Determined by ion chromatography.

Analysis: The chemical composition of CaMgAl-LDHs and CaMgAl-LDHs-400 were listed in Table 1. The content of Ca<sup>2+</sup>, Mg<sup>2+</sup>, Al<sup>3+</sup> and Cl<sup>-</sup> were analyzed by ICP-OES technique and Ion chromatography, respectively. Based on the molar ratio of Ca<sup>2+</sup>, Mg<sup>2+</sup>, Al<sup>3+</sup> and Cl<sup>-</sup>, and the corresponding charge balance, the CaMgAl-LDHs can be expressed by Ca<sub>1.89</sub>Mg<sub>0.89</sub>Al<sub>1.0</sub>(OH)<sub>7.5</sub>Cl<sub>0.83</sub>(CO<sub>3</sub>)<sub>0.11</sub>·yH<sub>2</sub>O. The CaMgAl-LDHs-400 materials after 4 hrs of calcination still contain a small amount of chloride, and can be expressed as Ca<sub>1.91</sub>Mg<sub>0.98</sub>Al<sub>1.0</sub>Cl<sub>0.12</sub>O<sub>4</sub>.
